# Supplementary material for: Downregulation of miR-130b~301b cluster is mediated by aberrant promoter methylation and impairs cellular senescence in prostate cancer
Source: Springer Nature journal article supplement (doi:10.1186/s13045-017-0415-1), 2017-02-06
Supplement: MOESM2 [file 12046862]

# Supplementary Figure 1

**A**

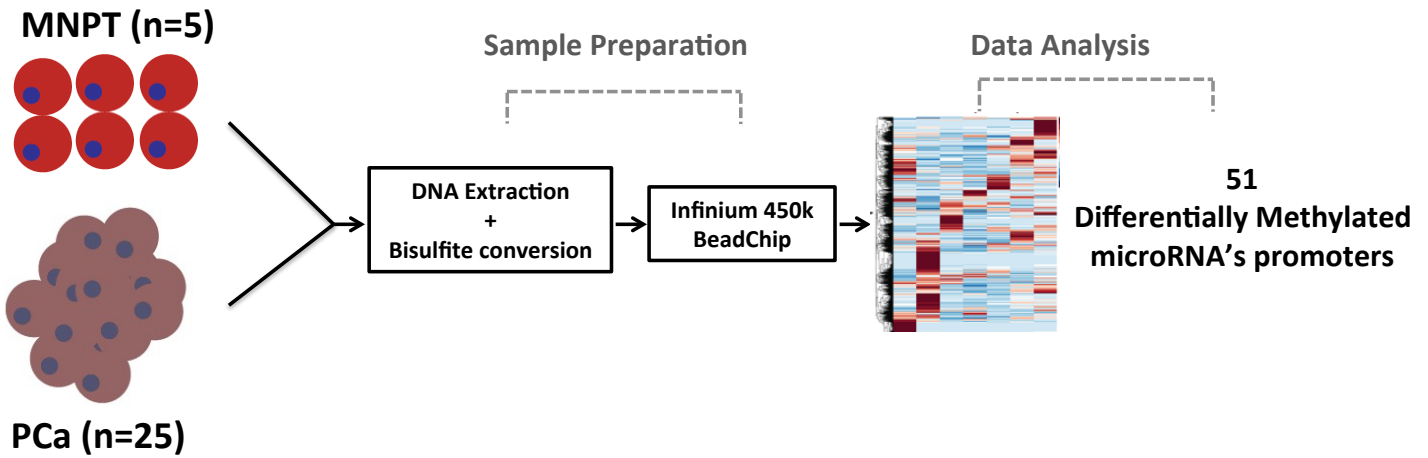

**B**

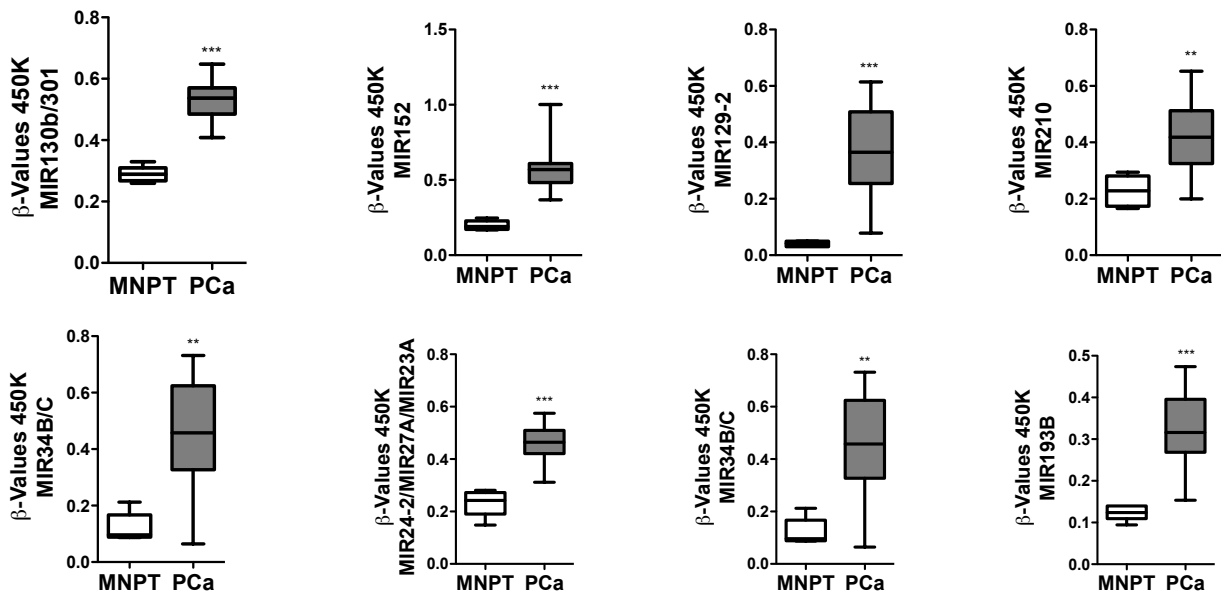

**C**

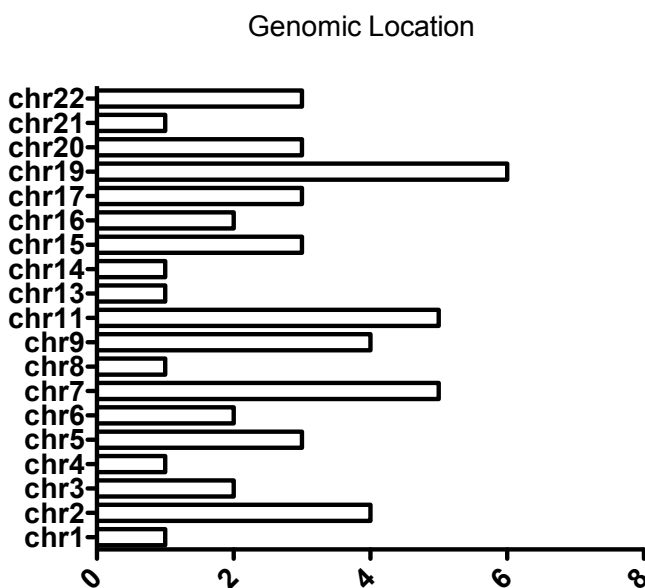

**D**

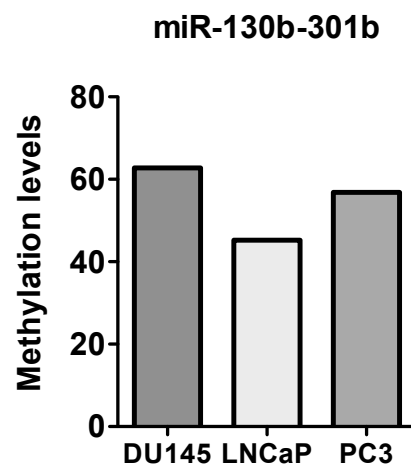

# Supplementary Figure 2

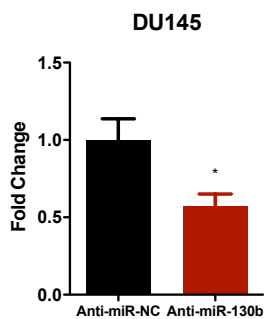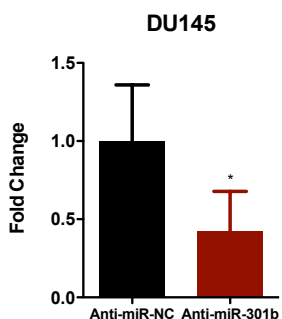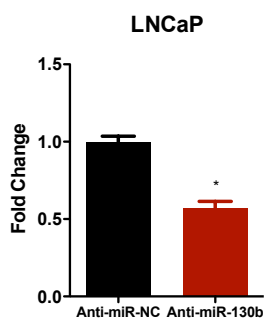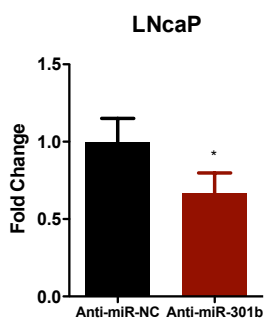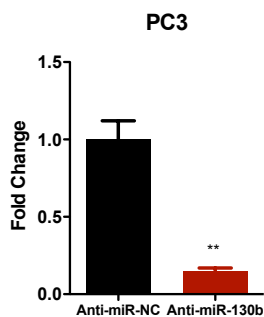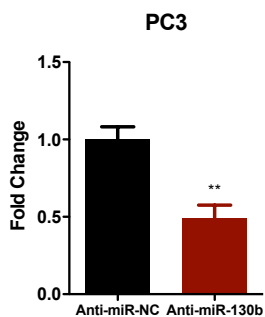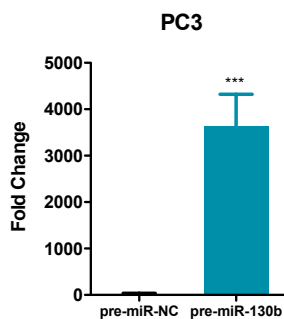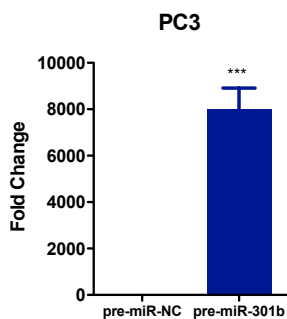

# Supplementary Figure 3

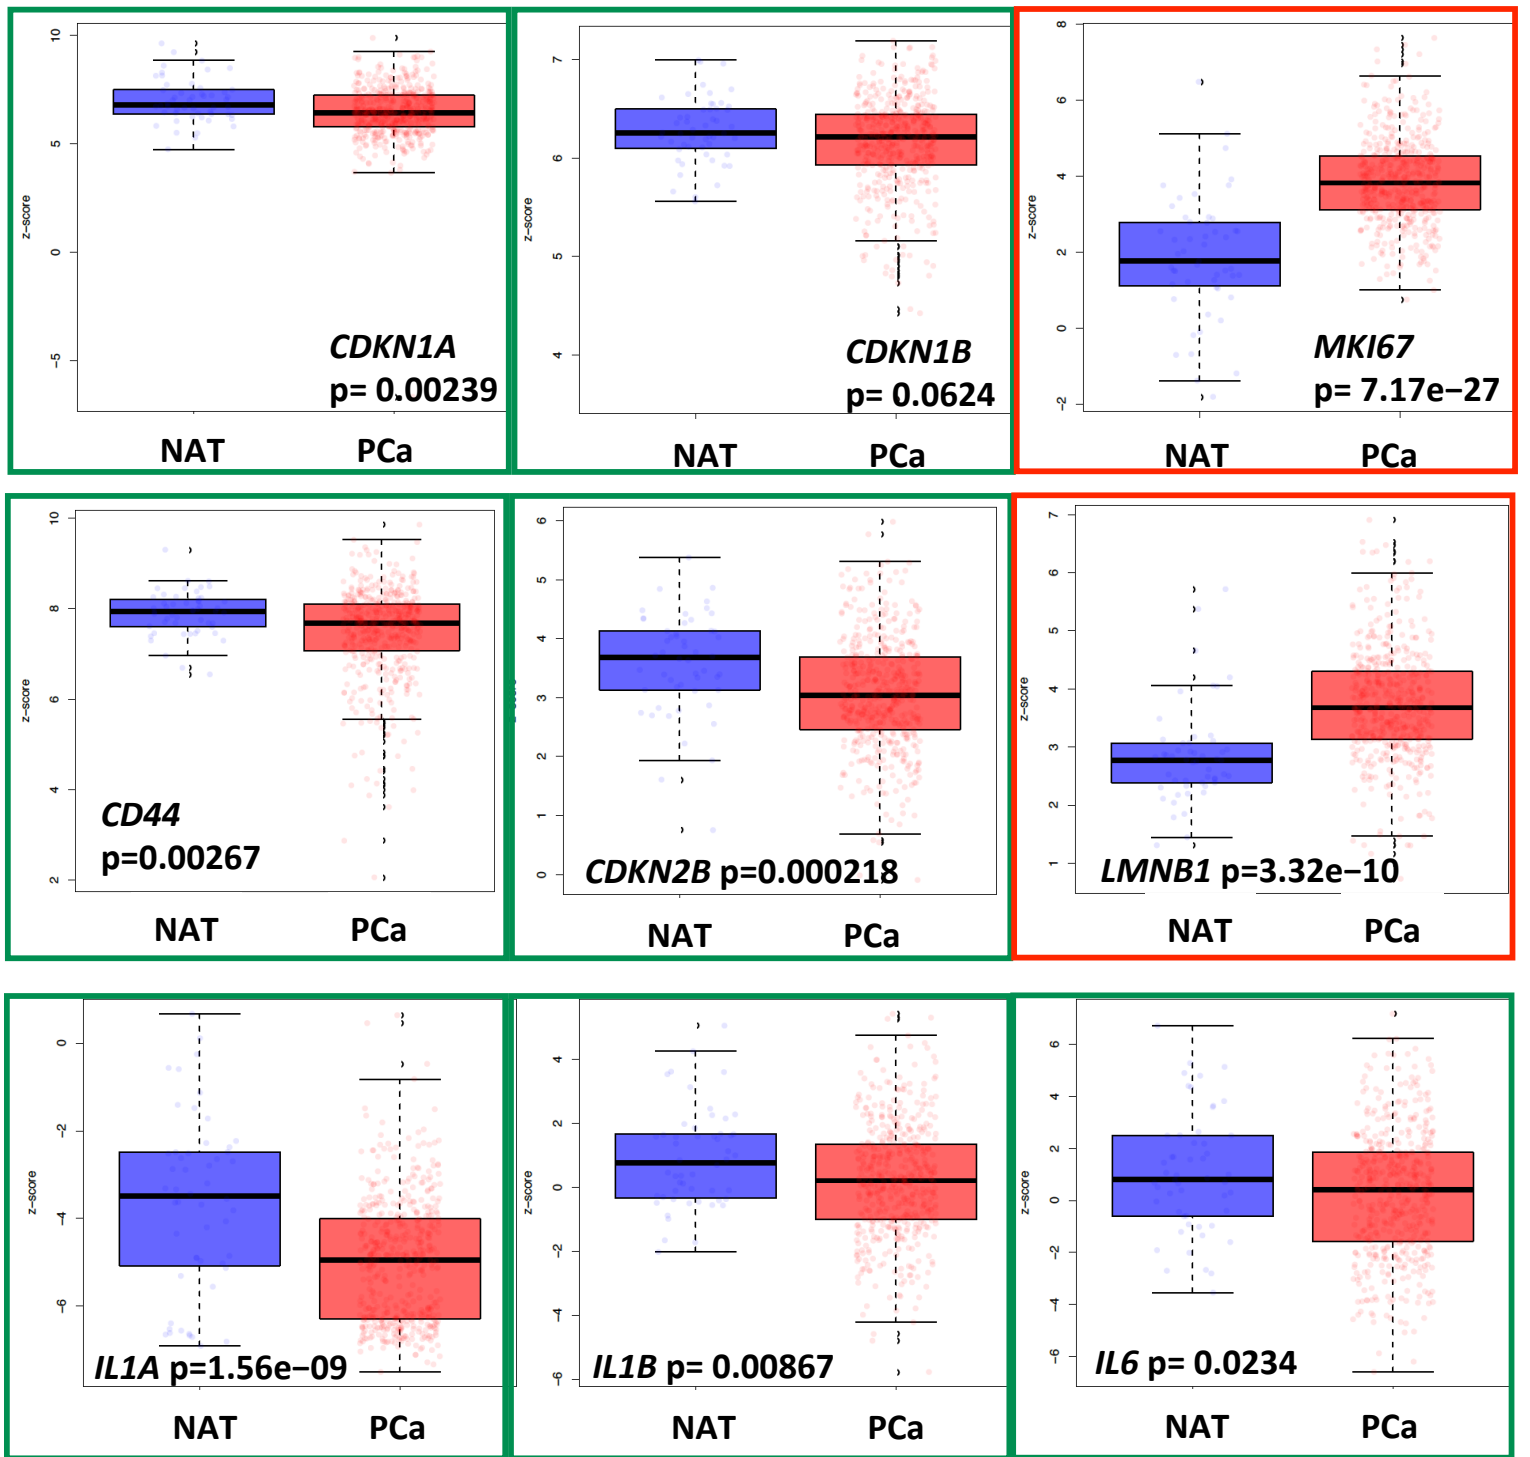

**Supplementary  
Figure 4**

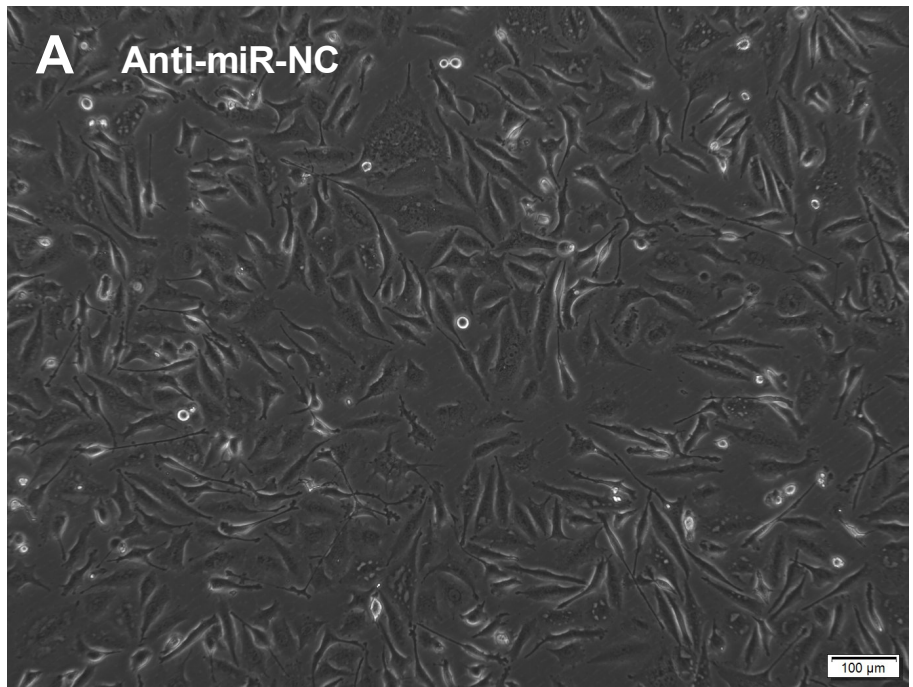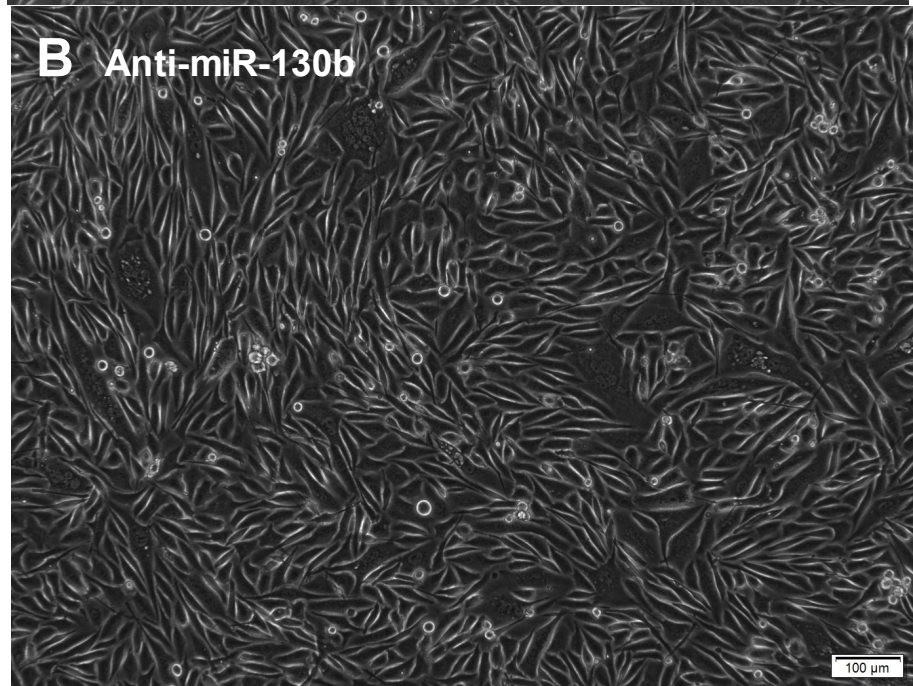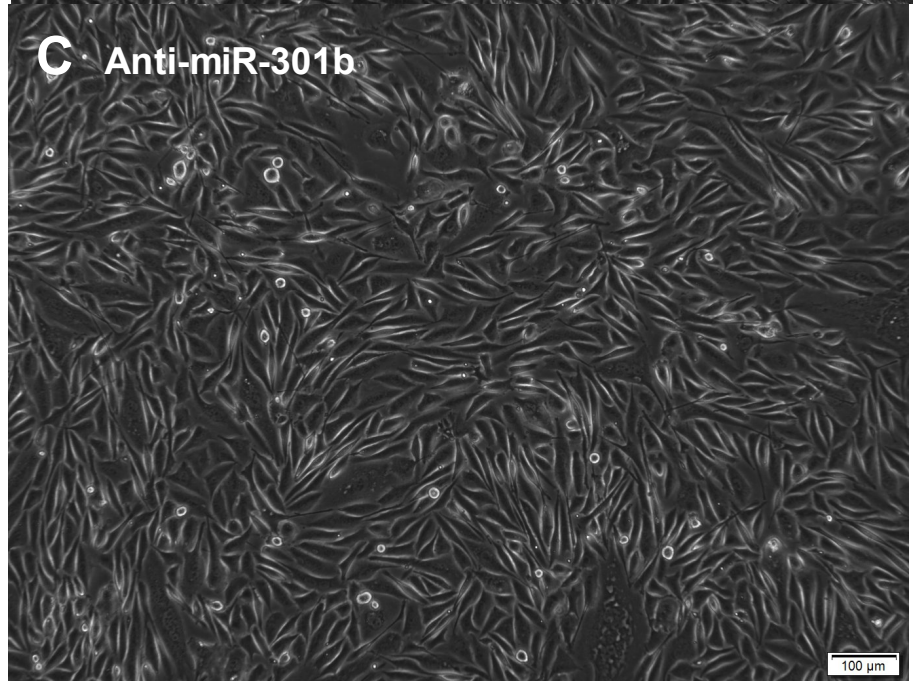



**Supplementary  
Figure 5**

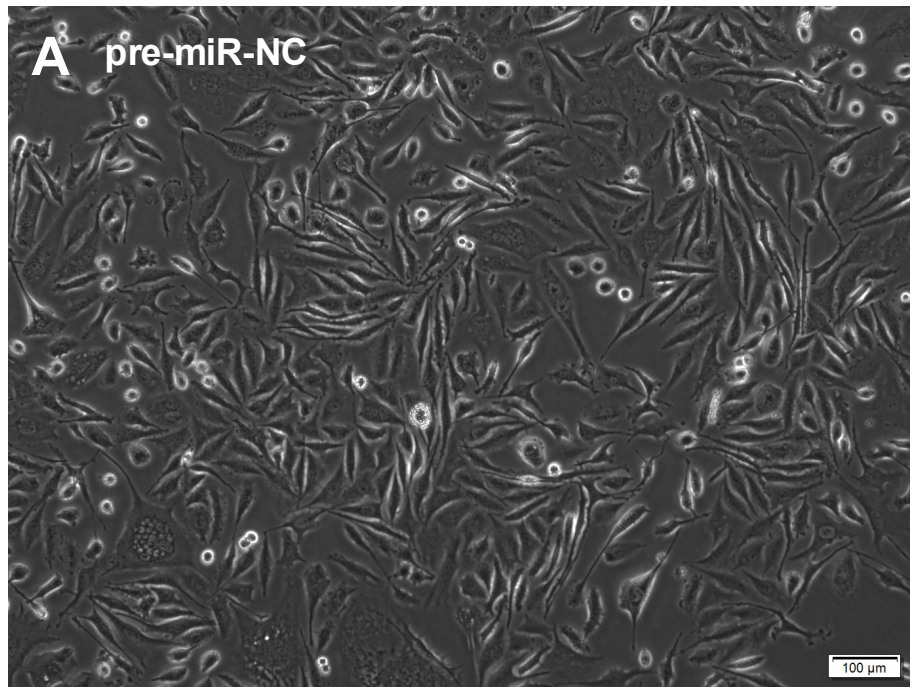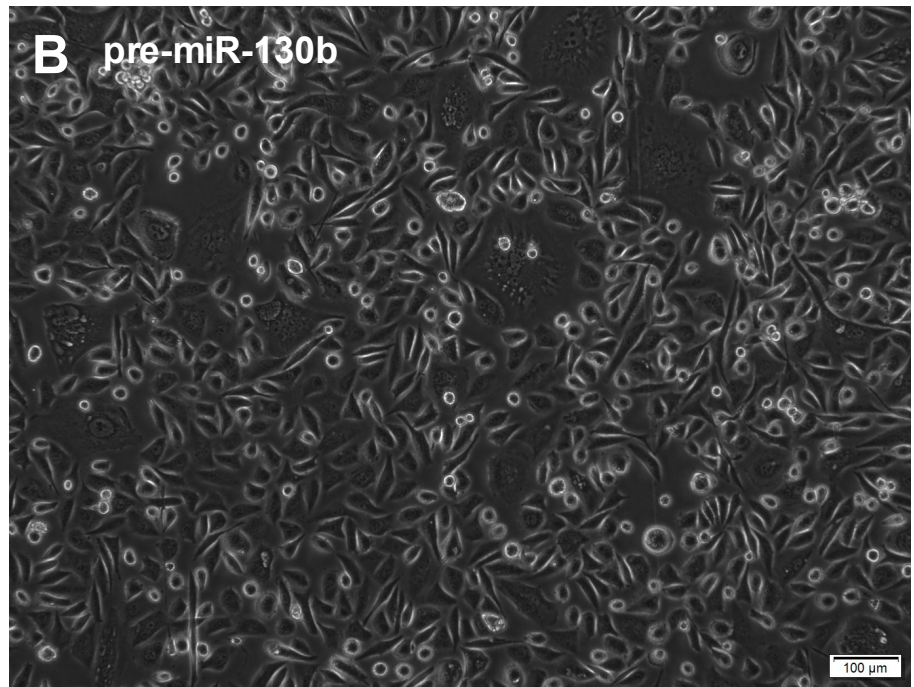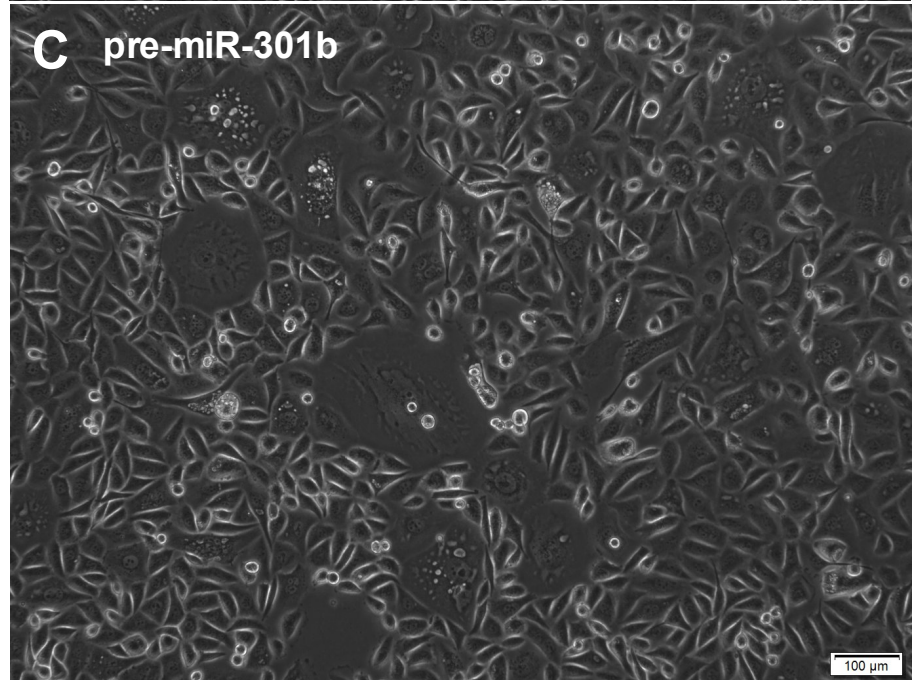

# Supplementary Figure 6

## A

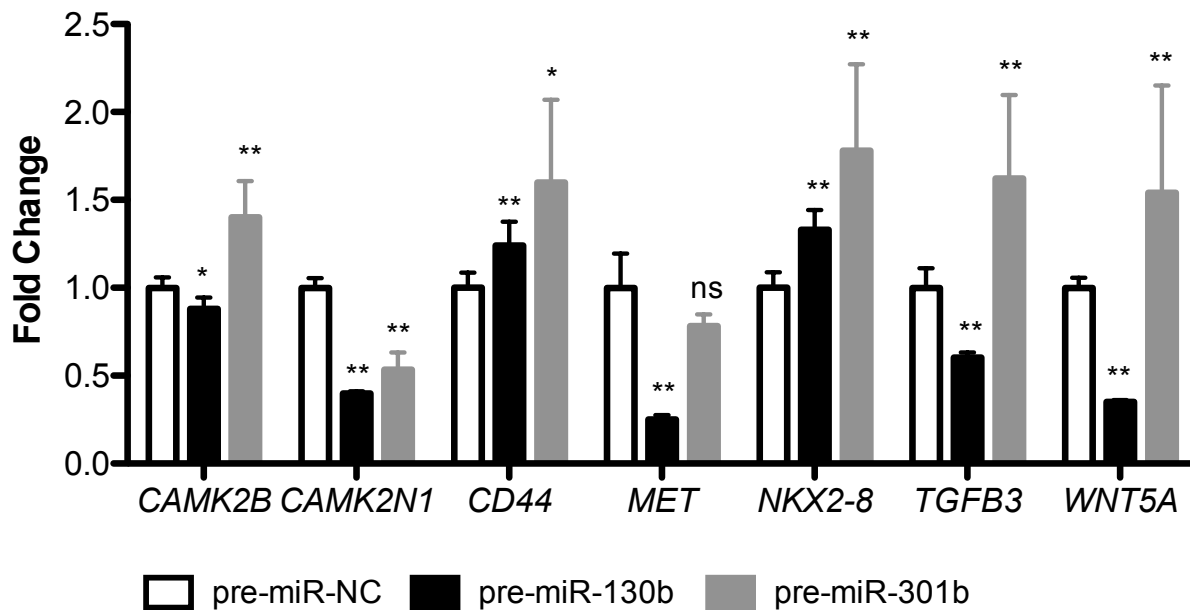

## B

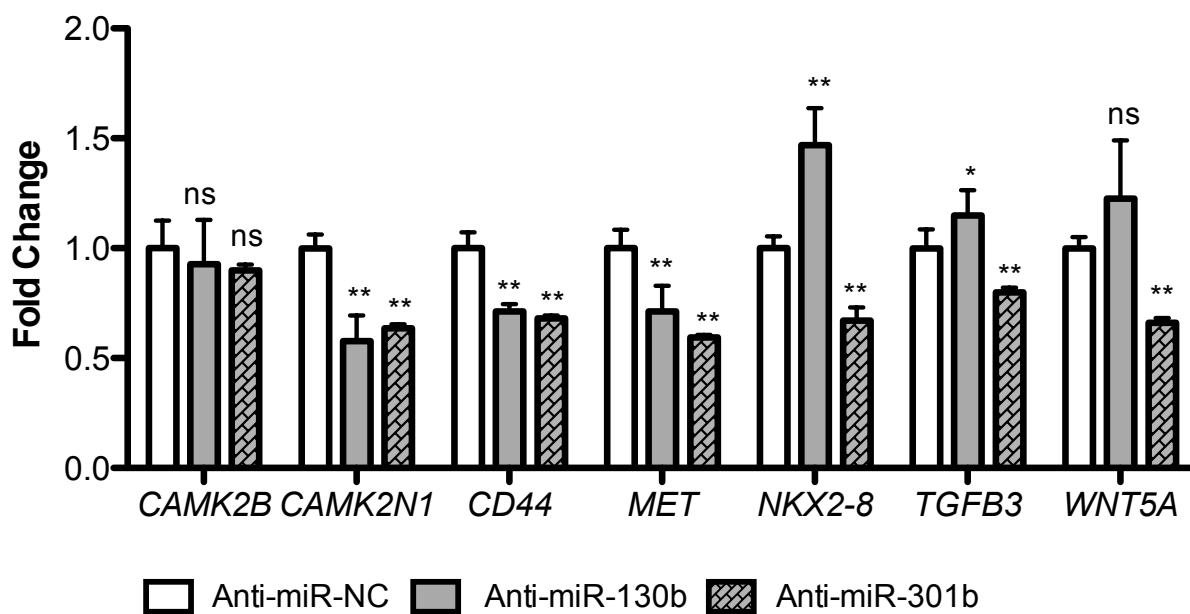

## Supplementary Figure 7

3' uacgggAAAGUAGUAAc 5' **hsa-miR-130b**  
                  | | | | | : | | | | |  
132:5' ccuuaaUUUCCUUUUUGACACUg 3' **LMNB1**

3' uacgggaaagUAGUAAc 5' **hsa-miR-130b**  
                  | | : | | | | | | | | |  
194:5' caagaugugaAUUAUUGACACUg 3' **LMNB1**

3' cgaaacuguuauAGUAAc 5' **hsa-miR-301b**  
                  | : | | | | | | | | |  
132:5' ccuuaaUUUCCUUUUUGACACUg 3' **LMNB1**

3' cgaaacuguaUAGUAAc 5' **hsa-miR-301b**  
                  | | : | | | | | | | | |  
194:5' caagaugugaAUUAUUGACACUg 3' **LMNB1**
